# Supplementary material
Source: PubMed Central journal article supplement (PMC9097017)

**Cell, Volume 185**

**Supplemental information**

**Disrupting autorepression circuitry generates**

**“open-loop lethality” to yield**

**escape-resistant antiviral agents**

**Sonali Chaturvedi, Michael Pablo, Marie Wolf, Daniel Rosas-Rivera, Giuliana Calia, Arjun J. Kumar, Noam Vardi, Kelvin Du, Joshua Glazier, Ruian Ke, Matilda F. Chan, Alan S. Perelson, and Leor S. Weinberger**

# Figure S1

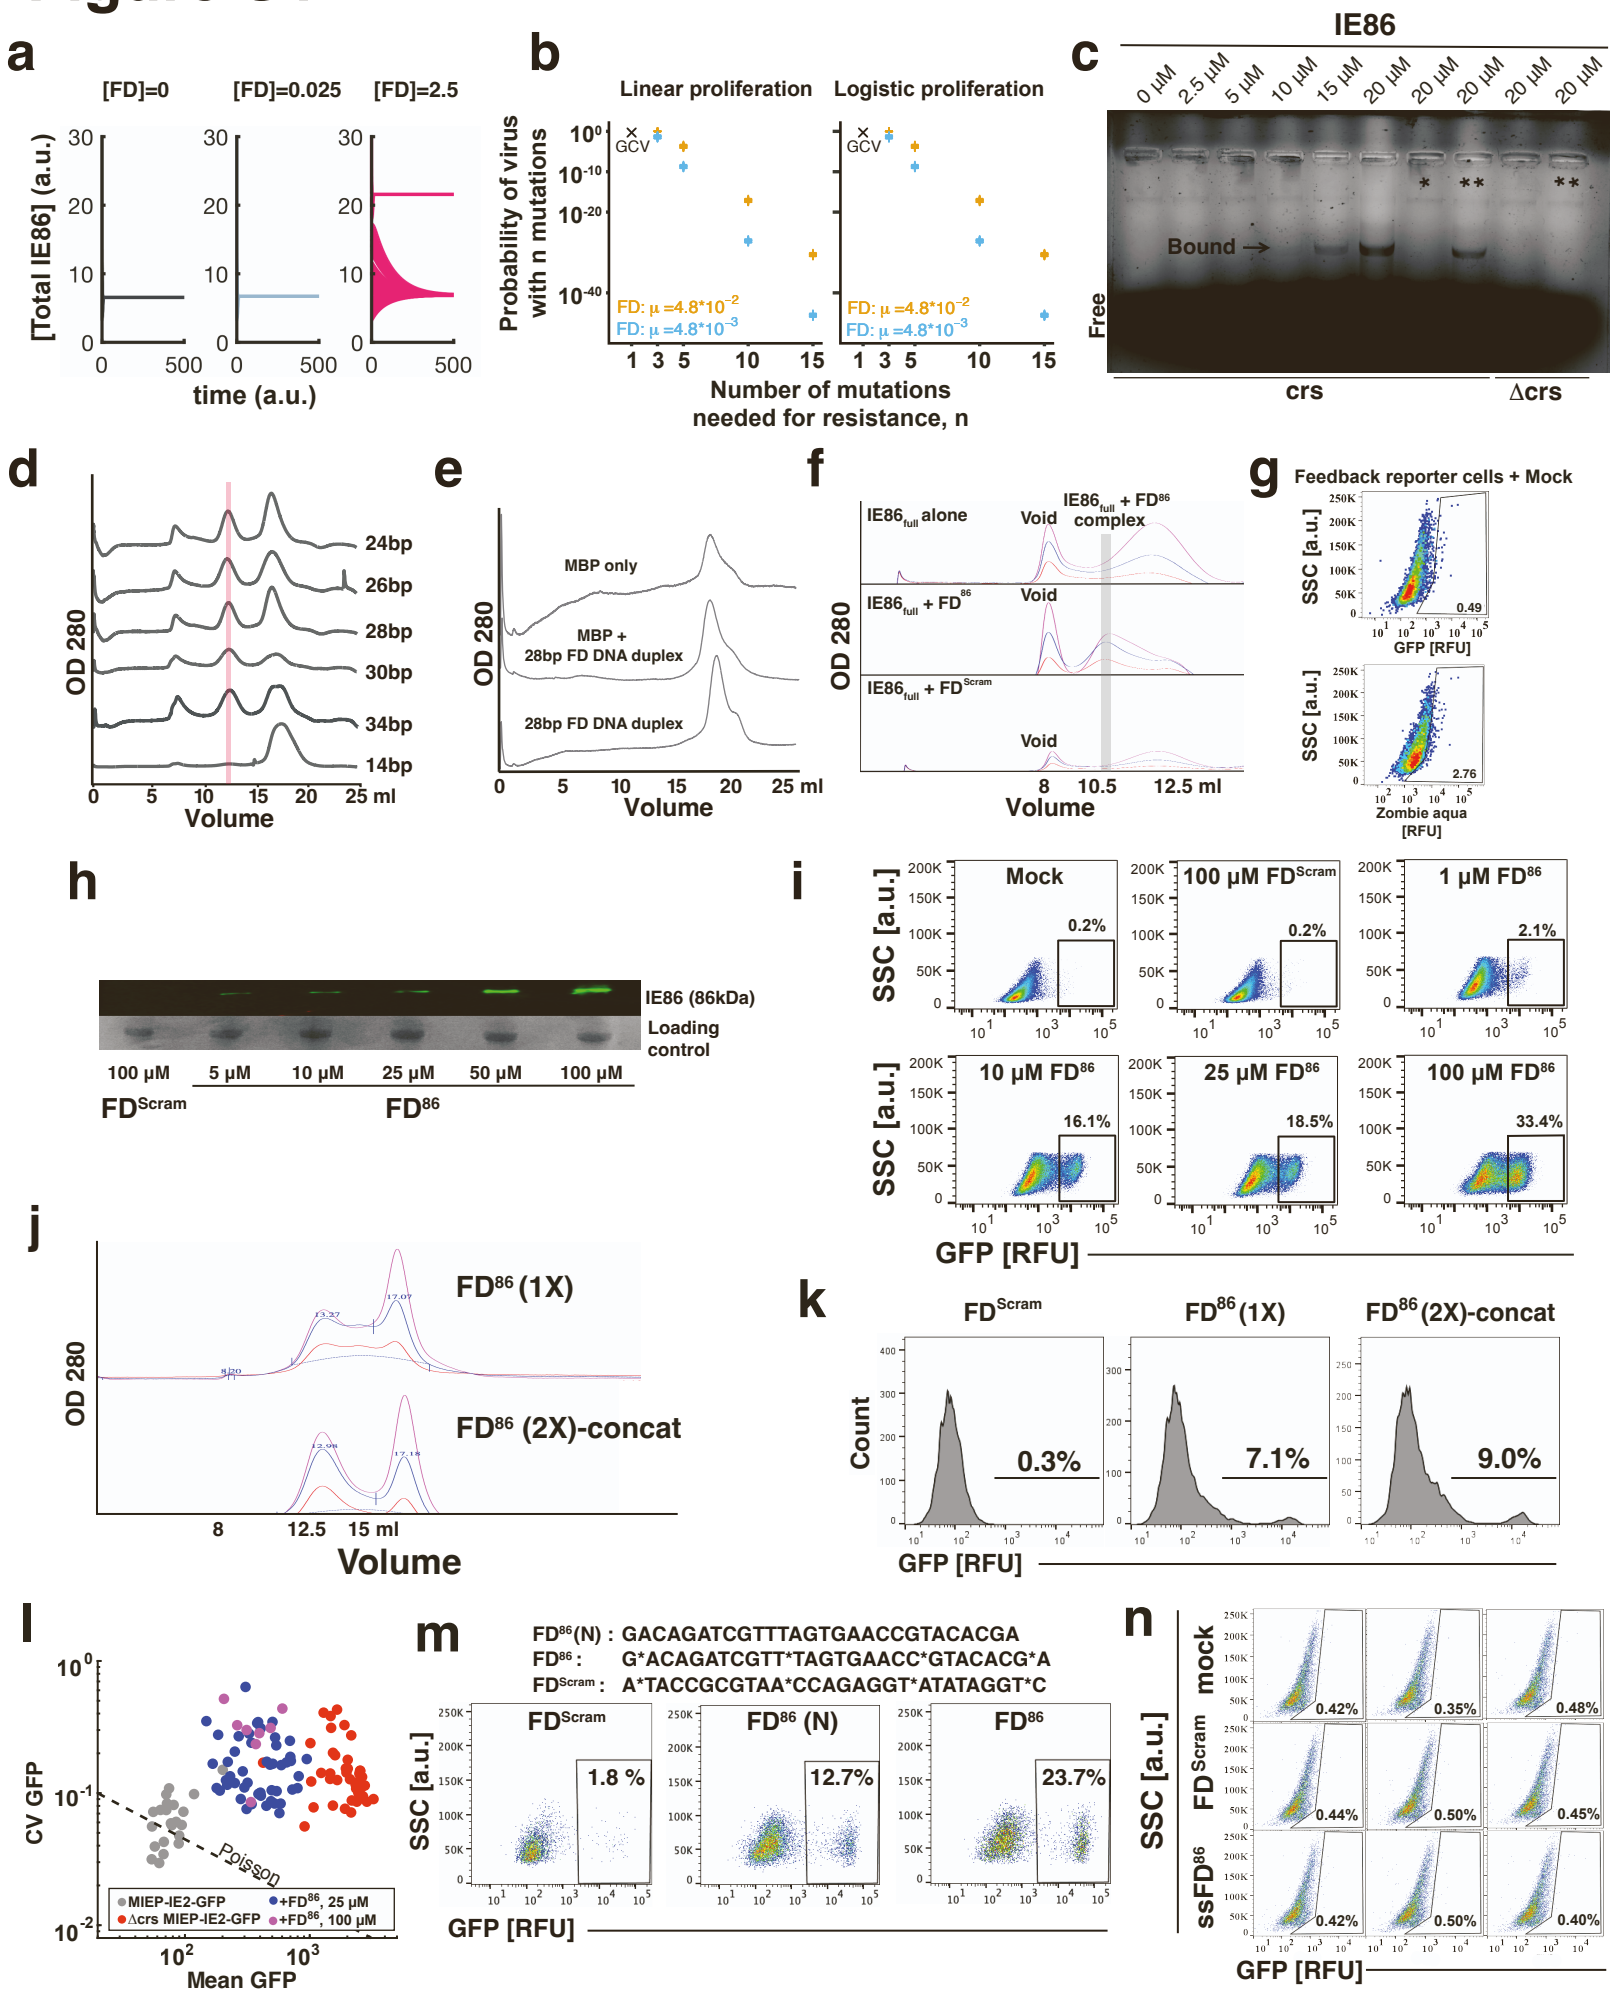

# Figure S2

**a**

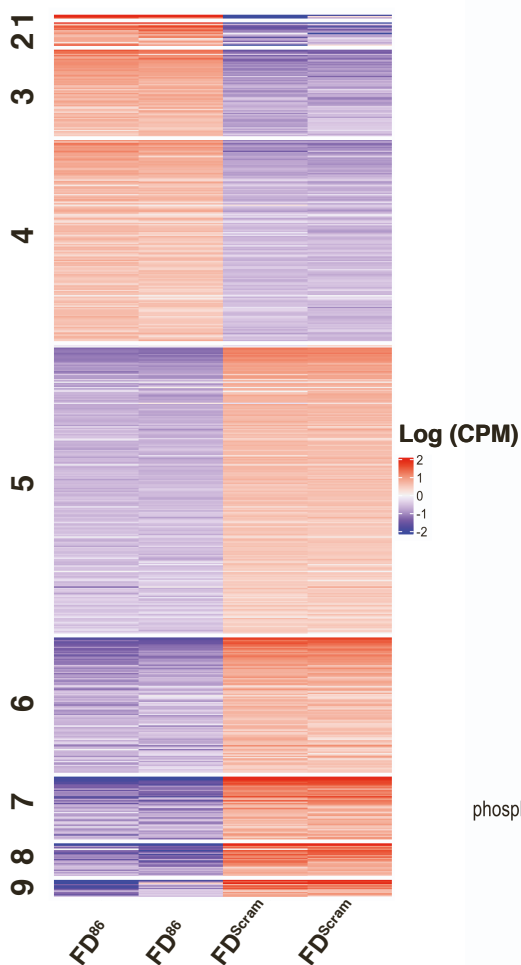

**b**

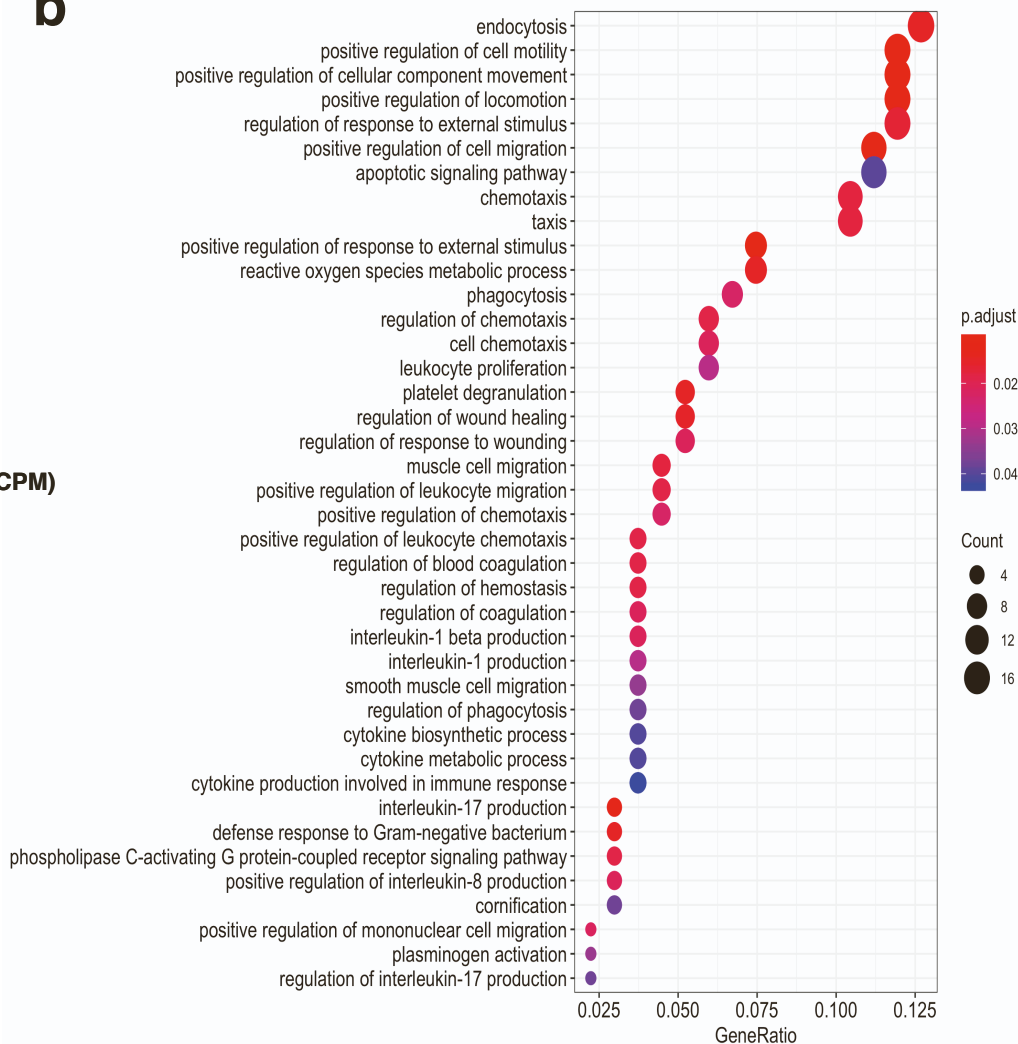

**c**

**FD<sup>Scram</sup> vs Mock**

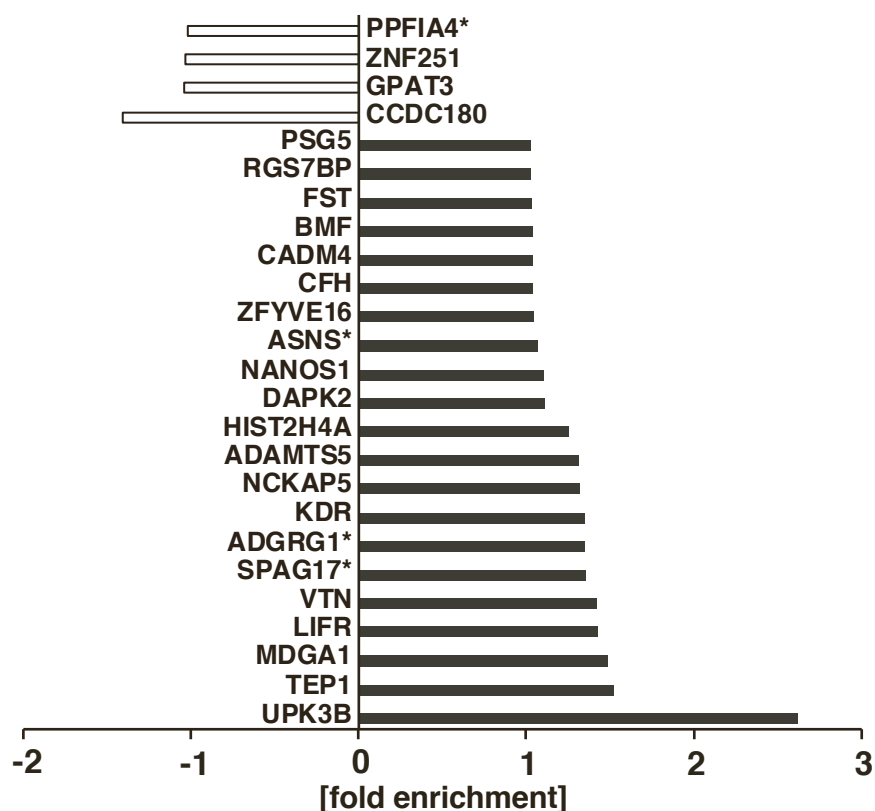

**d**

**FD<sup>86</sup> vs Mock**

**Cytokine-mediated signaling pathway**

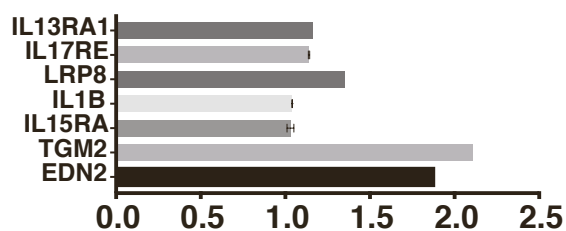

**Inflammatory response**

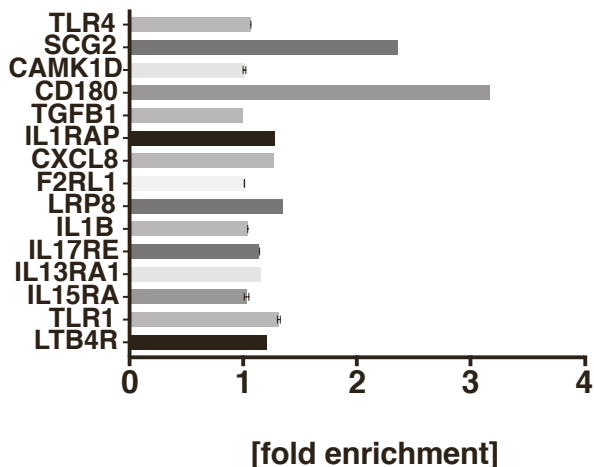

# Figure S3

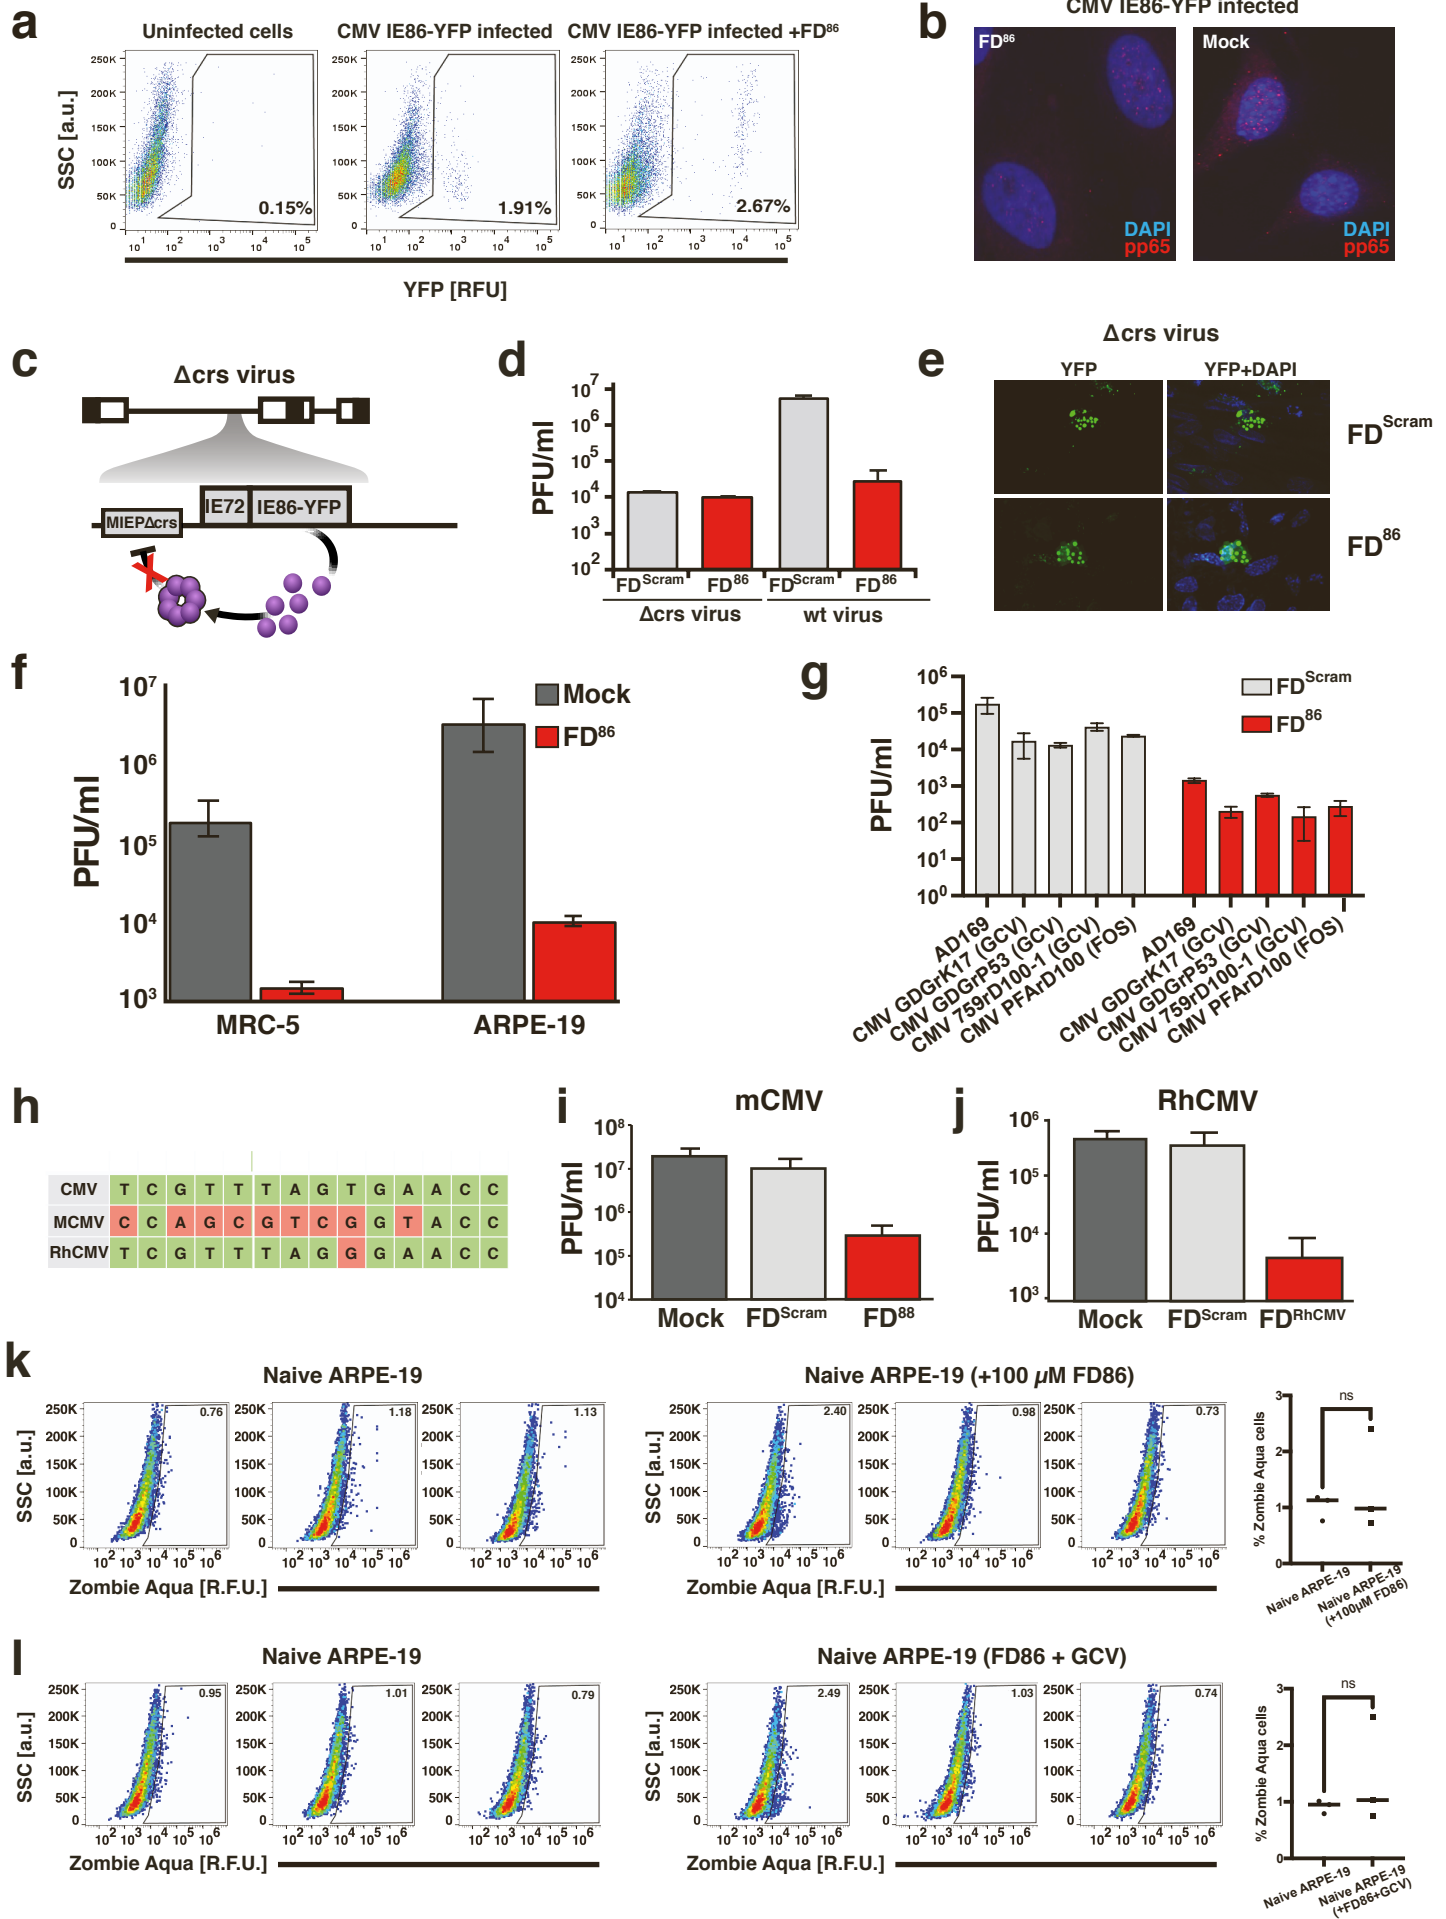

# Figure S4

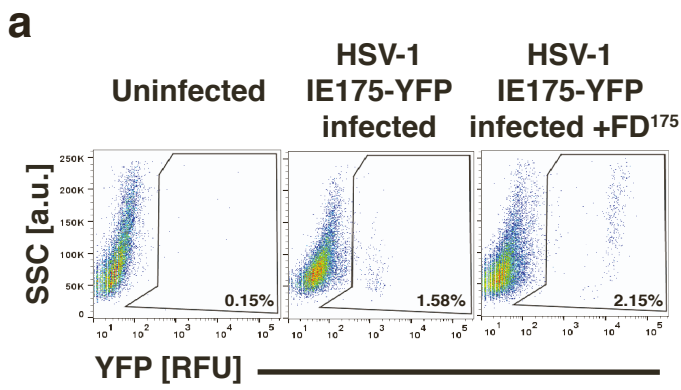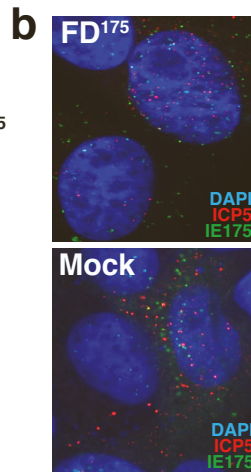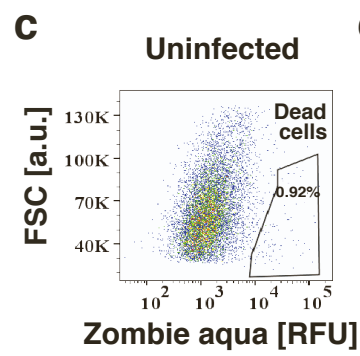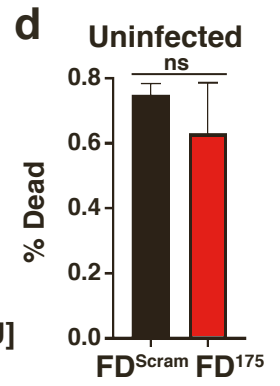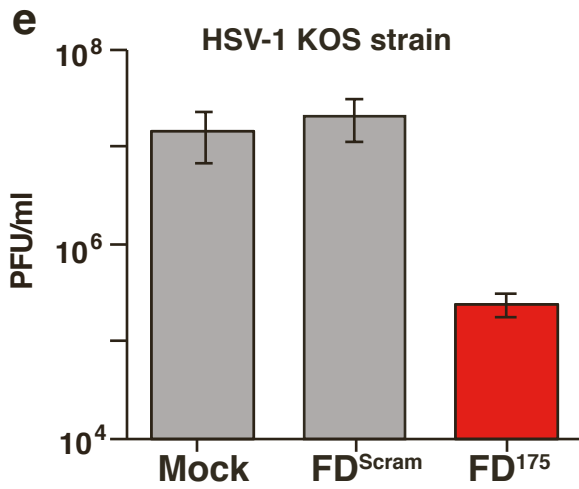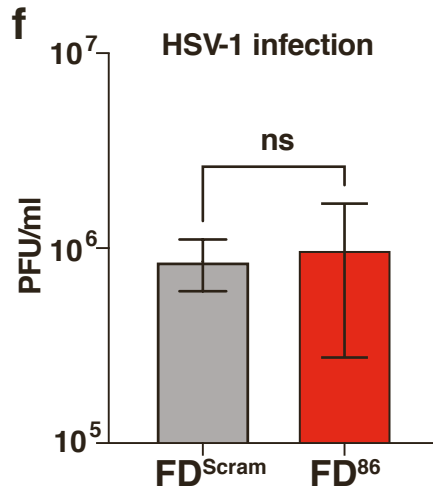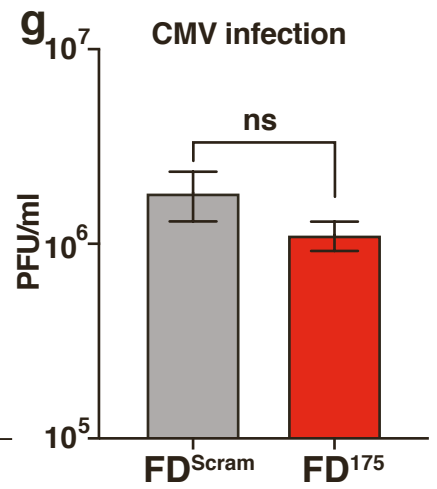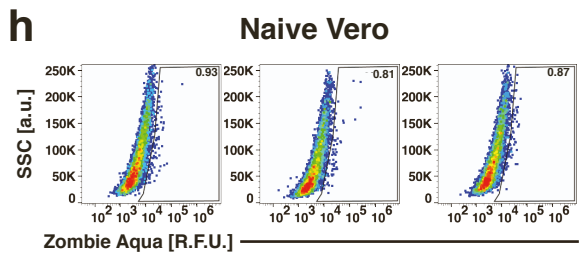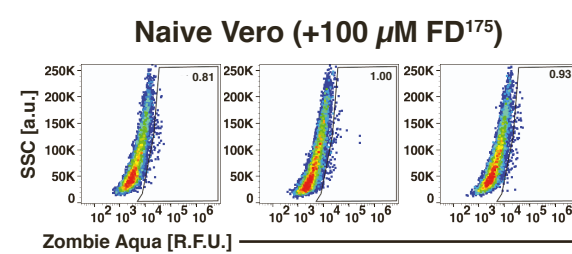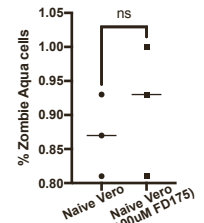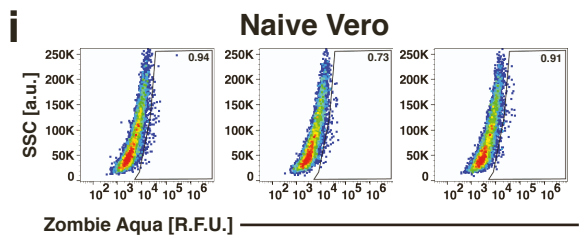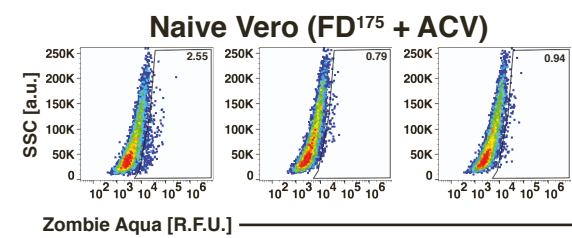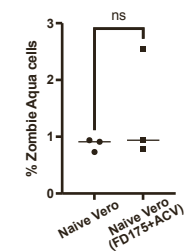

# Figure S5

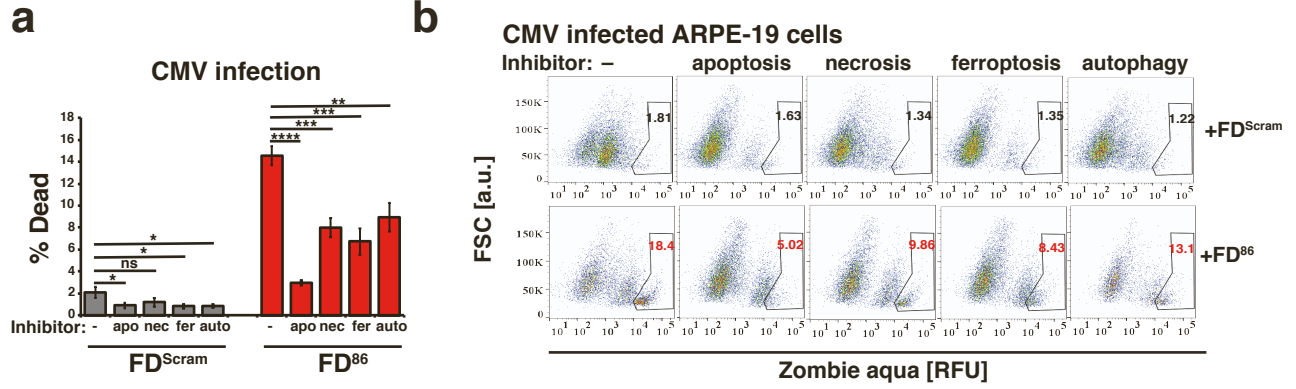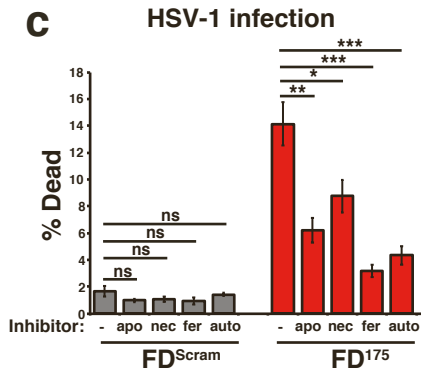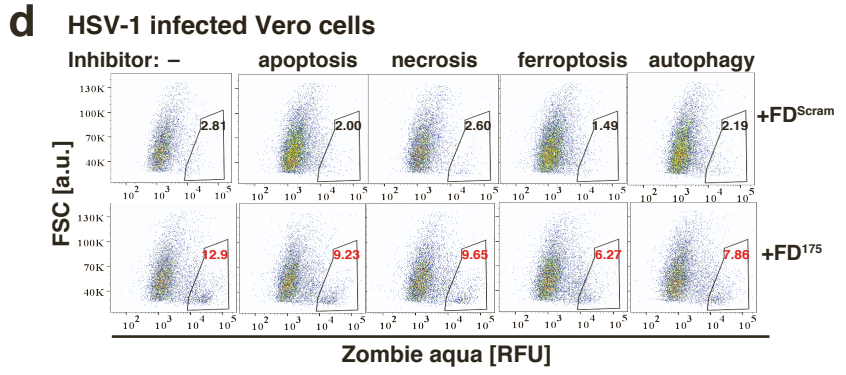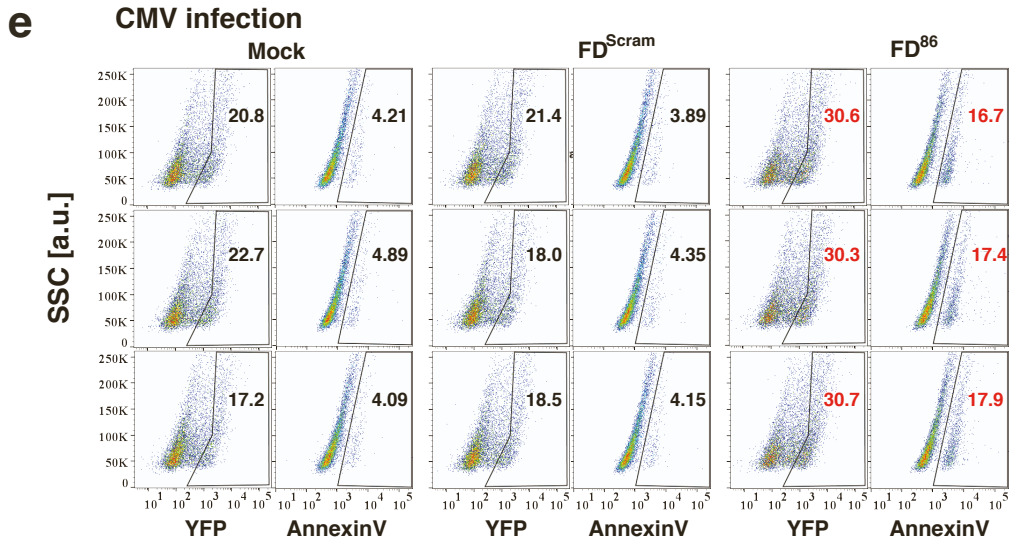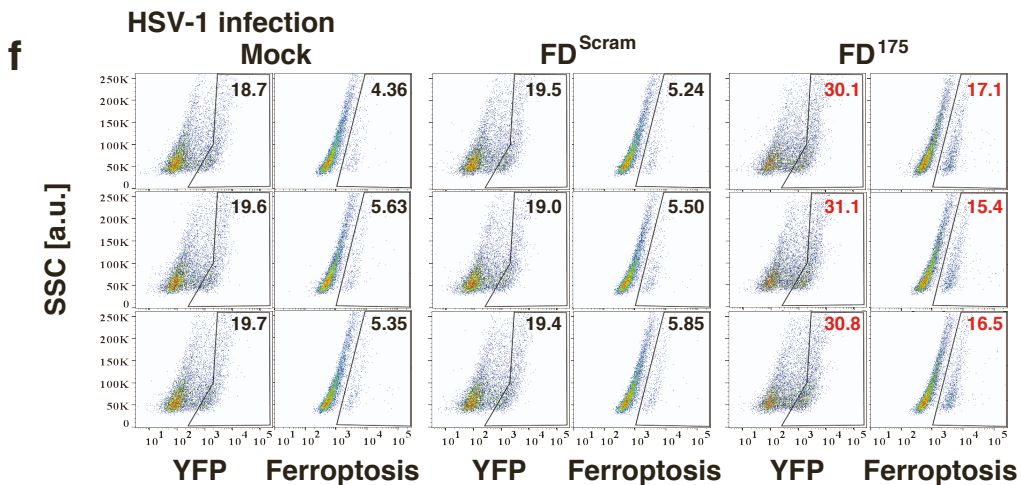



# Figure S6

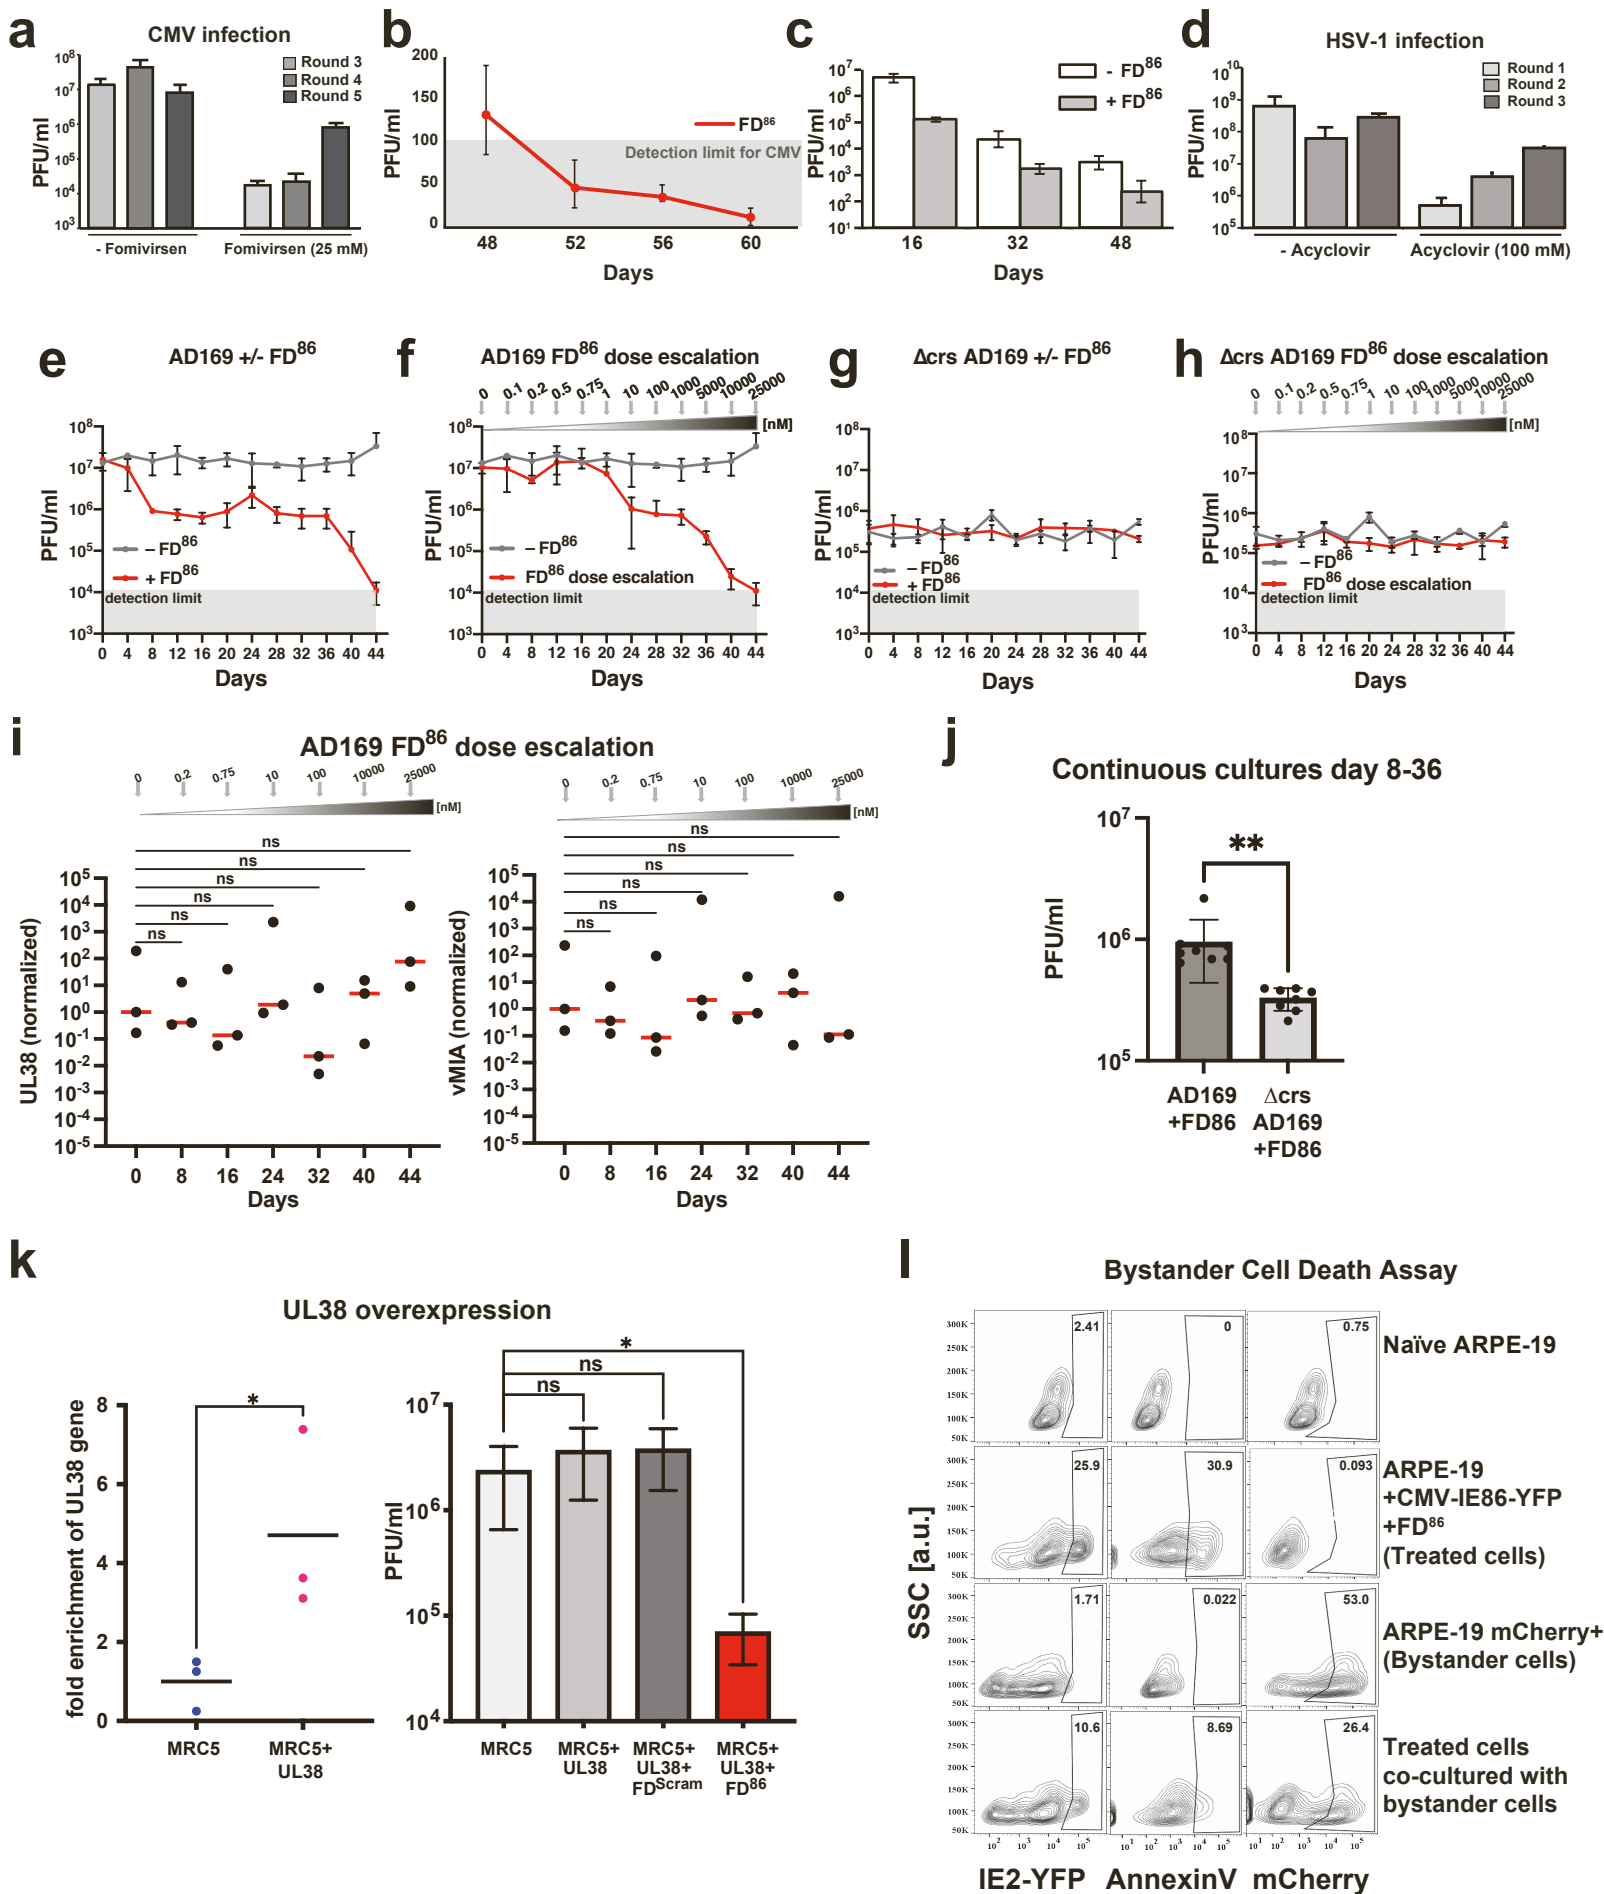

# Figure S7

a

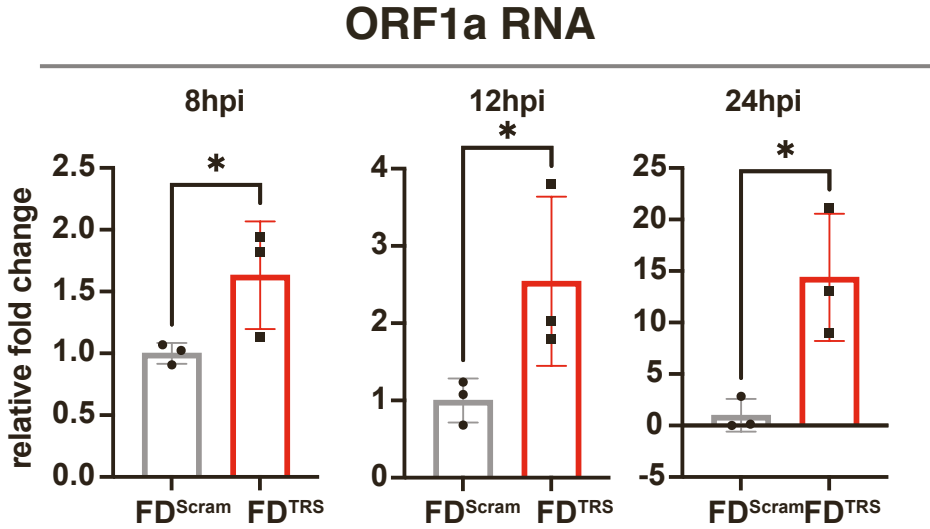

b

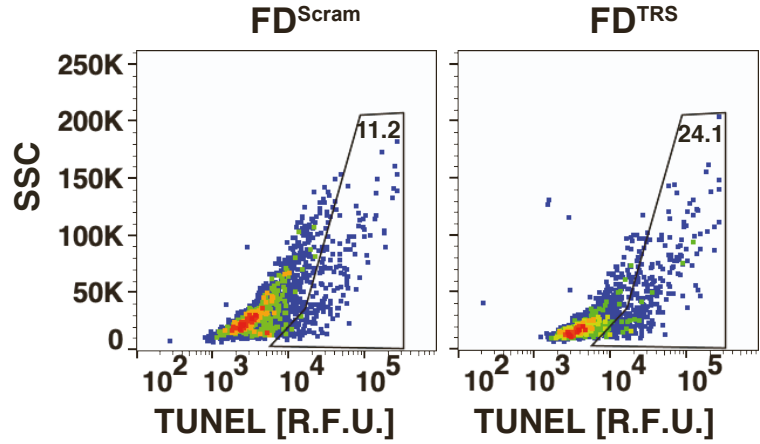

Supplement: mmc1.pdf [file mmc1.pdf]
